# Supplementary material
Source: Springer Nature journal article supplement (https://www.springermedizin.de/resource/supplementary/12890_2013_540_MOESM9_ESM.pdf/9505706)

**Control**

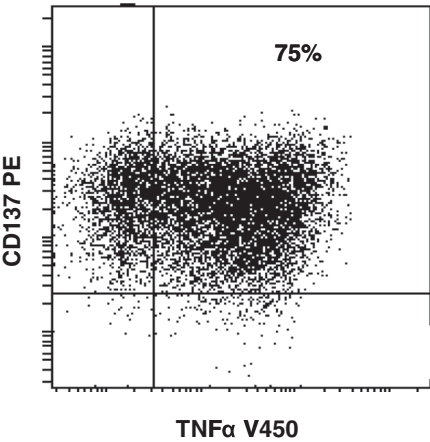

**COPD**

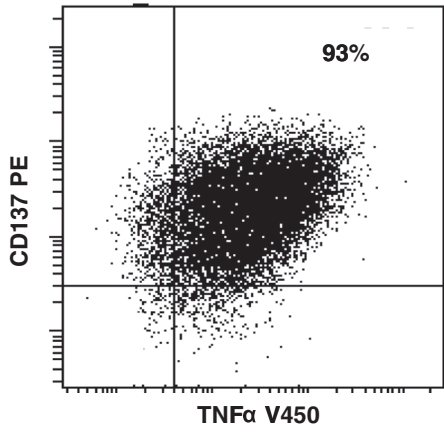

Supplement: MOESM9 [file 9505706]
